# Supplementary material for: Factors Affecting Post-Stroke Depression in Acute Ischemic Stroke Patients after 3 Months
Source: MDPI journal article supplement (doi:10.3390/jpm11111178), 2021-11-11
Supplement: s1 [file s1]

**Supplementary Table S1. Baseline characteristics of study population according to post-stroke depression (age 65-75)**

| Variables (n=119)           | post-stroke depression |                    | <i>p</i> value |
|-----------------------------|------------------------|--------------------|----------------|
|                             | Negative<br>(n=90)     | Positive<br>(n=29) |                |
| <b>Demographics</b>         |                        |                    |                |
| Age (years)                 | 65.4±6.5               | 66.2±7.0           | <i>0.559</i>   |
| Male (%)                    | 58 (64.4)              | 16 (55.2)          | <i>0.371</i>   |
| BMI (kg/m <sup>2</sup> )    | 23.3±3.8               | 24.5±3.0           | <i>0.119</i>   |
| <b>Cardiovascular risk</b>  |                        |                    |                |
| Hypertension                | 48 (53.3)              | 15 (51.7)          | <i>0.880</i>   |
| Diabetes mellitus           | 42 (46.7)              | 11 (37.9)          | <i>0.410</i>   |
| Atrial fibrillation         | 19 (21.1)              | 3 (10.3)           | <i>0.274</i>   |
| Dyslipidemia                | 22 (24.4)              | 6 (20.7)           | <i>0.678</i>   |
| Previous stroke             | 17 (18.9)              | 5 (17.2)           | <i>0.842</i>   |
| Previous IHD                | 8 (8.9)                | 3 (10.3)           | <i>0.814</i>   |
| Smoking                     | 19 (21.1)              | 6 (20.7)           | <i>0.961</i>   |
| Alcohol consumption         | 27 (30.0)              | 8 (27.6)           | <i>0.804</i>   |
| <b>TOAST classification</b> |                        |                    |                |
| LAA                         | 26 (28.9)              | 10 (34.5)          | <i>0.965</i>   |
| CE                          | 17 (18.9)              | 6 (20.7)           |                |
| SVO                         | 16 (17.8)              | 4 (13.8)           |                |
| SUE                         | 25 (27.8)              | 7 (24.1)           |                |
| SOE                         | 6 (6.7)                | 2 (6.9)            |                |
| <b>Psychological test</b>   |                        |                    |                |

|                                |            |            |        |
|--------------------------------|------------|------------|--------|
| Onset to test (day)            | 2.7±1.8    | 2.8±2.0    | 0.795  |
| HRDS score at admission        | 5.8±4.4    | 15.5±10.3  | <0.001 |
| <b>Hospitalization factors</b> |            |            |        |
| Onset to admission (hr)        | 13.7±18.9  | 13.5±18.3  | 0.976  |
| Hospitalization period (day)   | 8.0±4.2    | 8.8±4.7    | 0.388  |
| <b>Neurological Severity</b>   |            |            |        |
| Initial NIHSS                  | 3.5±3.8    | 4.8±5.4    | 0.223  |
| NIHSS at discharge             | 1.9±2.2    | 4.7±5.1    | 0.008  |
| NIHSS after 3 months           | 1.1±1.7    | 4.0±5.1    | 0.005  |
| Initial mRS                    | 1.9±1.3    | 2.4±1.6    | 0.125  |
| mRS at discharge               | 1.4±1.1    | 2.2±1.6    | 0.014  |
| mRS after 3 months             | 0.8±1.1    | 1.8±1.7    | 0.005  |
| <b>Laboratory findings</b>     |            |            |        |
| WBC (103/uL)                   | 7.6±2.5    | 8.0±2.6    | 0.389  |
| Hb (g/dL)                      | 14.0±4.0   | 13.8±1.5   | 0.773  |
| PLT (103/uL)                   | 242.5±67.8 | 242.9±61.7 | 0.976  |
| Protein (g/dL)                 | 6.5±0.5    | 6.5±0.6    | 0.488  |
| Albumin (g/dL)                 | 3.8±0.4    | 3.9±0.3    | 0.226  |
| AST (U/L)                      | 24.8±14.3  | 29.3±37.6  | 0.352  |
| ALT (U/L)                      | 20.7±12.8  | 20.8±13.1  | 0.984  |
| ALP (U/L)                      | 55.4±15.4  | 60.0±18.6  | 0.207  |
| Glucose (mg/dL)                | 104.8±46.4 | 112.7±44.8 | 0.423  |
| BUN (mg/dL)                    | 14.3±4.8   | 17.1±9.1   | 0.038  |
| Creatinine (mg/dL)             | 0.9±0.3    | 0.9±0.3    | 0.950  |

|                           |             |            |       |
|---------------------------|-------------|------------|-------|
| Total Cholesterol (mg/dL) | 203.0±210.1 | 183.3±43.4 | 0.631 |
| Triglycerides (mg/dL)     | 122.5±89.1  | 115.0±62.4 | 0.683 |
| Uric acid (mg/dL)         | 5.1±1.4     | 5.2±2.8    | 0.868 |
| HDL (mg/dL)               | 43.8±10.8   | 43.9±9.6   | 0.960 |
| LDL (mg/dL)               | 107.4±37.8  | 118.8±42.3 | 0.172 |
| Ca (mg/dL)                | 8.8±0.4     | 8.8±0.4    | 0.519 |
| Na (mEq/L)                | 139.8±3.0   | 141.1±4.1  | 0.059 |
| K (mEq/L)                 | 4.0±0.3     | 4.1±0.4    | 0.279 |
| ESR (mm/hr)               | 12.8±9.8    | 13.5±10.2  | 0.738 |
| hs-CRP (mg/dL)            | 0.7±1.3     | 2.1±3.6    | 0.041 |
| TSH (μIU/ml)              | 1.6±1.5     | 1.8±2.5    | 0.555 |
| fT4 (ng/dL)               | 1.2±0.3     | 1.3±0.5    | 0.293 |
| GFR (mL/min)              | 91.8±27.1   | 92.8±30.0  | 0.873 |

---

**Supplementary Table S2. Logistic regression analysis of post-stroke depression after 3 months (age 65-75)**

| Variables               | Univariate analysis  |                  | Multivariate analysis*  |                  |
|-------------------------|----------------------|------------------|-------------------------|------------------|
|                         | Crude OR<br>(95% CI) | <i>p</i> value   | Adjusted OR<br>(95% CI) | <i>p</i> value   |
| HRDS score at admission | 1.24 (1.13-1.36)     | <i>&lt;0.001</i> | 1.26 (1.14-1.39)        | <i>&lt;0.001</i> |
| NIHSS at discharge      | 1.25 (1.10-1.43)     | <i>0.001</i>     |                         |                  |
| hs-CRP                  | 1.32 (1.08-1.63)     | <i>0.008</i>     |                         |                  |

\*Adjusted for sex, HRDS score, NIHSS at discharge, and hs-CRP
